# Supplementary material for: Epigenetic regulation of serotype expression antagonizes transcriptome dynamics in Paramecium tetraurelia
Source: PubMed Central journal article supplement (PMC4535620; doi:10.1093/dnares/dsv014), 2015-07-31

**A.31-B.6**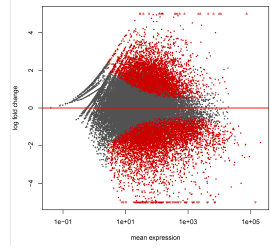**A.31-B.24**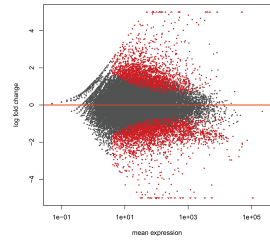**A.31-D.24**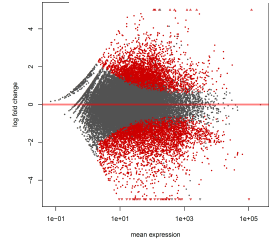**A.31-D.starv**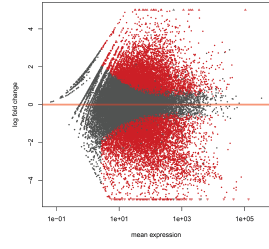**A.31-H.14**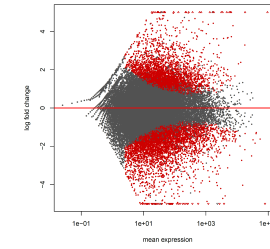**A.31-D.HS**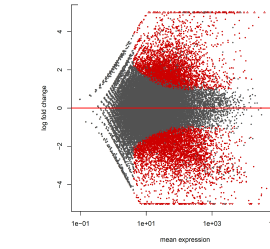**B.6-B.24**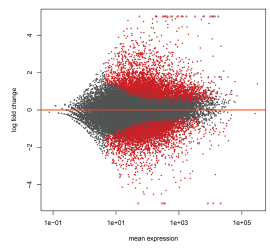**B.6-D.24**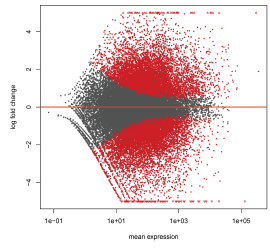**B.6-D.starv**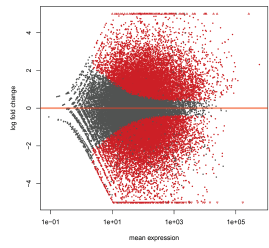**B.6-H.14**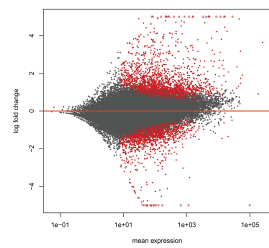**B.6-D.HS**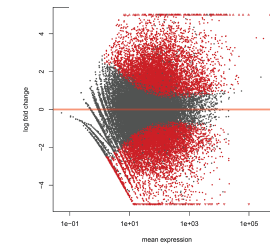**B.24-D.24**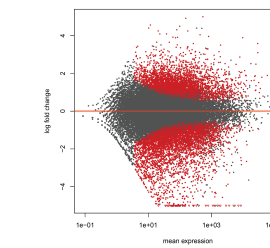**B.24-D.starv**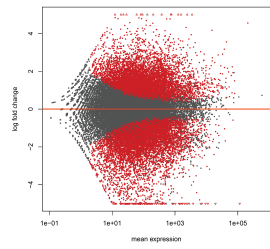**B.24-H.14**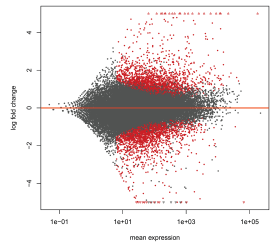**B.24-D.HS**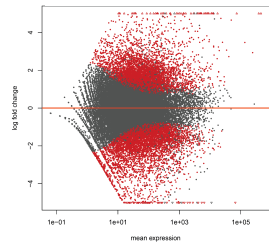**D.24-D.starv**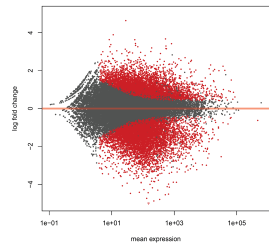**D.24-H.14**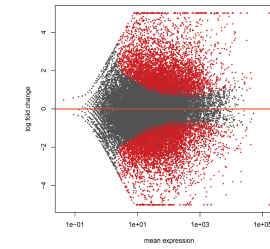**D.24-D.HS**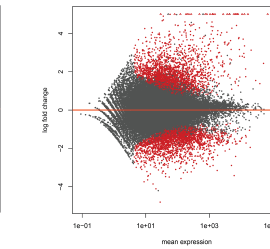**D.starv-H.14**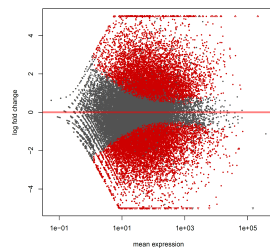**D.starv-D.HS**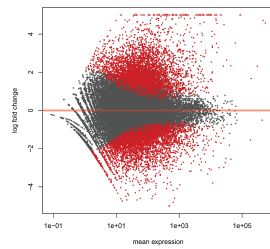**H.14-D.HS**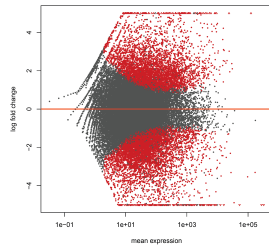

Supplement: supp_dsv014_dsv014supp_fig2.pdf [file supp_dsv014_dsv014supp_fig2.pdf]
