# Supplementary material for: Epigenetic regulation of serotype expression antagonizes transcriptome dynamics in Paramecium tetraurelia
Source: PubMed Central journal article supplement (PMC4535620; doi:10.1093/dnares/dsv014), 2015-07-31
Supplement: supp_dsv014_dsv014supp_fig5.pdf [file supp_dsv014_dsv014supp_fig5.pdf]

## D.24-D.HS

### Downregulated

| <b>ID</b>  | <b>p.adjusted</b> | <b>Biological function</b>                                           |
|------------|-------------------|----------------------------------------------------------------------|
| GO:0032502 | 3.19E-19          | developmental process                                                |
| GO:0032501 | 9.91E-19          | multicellular organismal process                                     |
| GO:0006508 | 4.08E-16          | proteolysis                                                          |
| GO:0044767 | 6.02E-16          | single-organism developmental process                                |
| GO:0044707 | 2.23E-15          | single-multicellular organism process                                |
| GO:0016020 | 5.14E-15          | membrane                                                             |
| GO:0016787 | 6.01E-11          | hydrolase activity                                                   |
| GO:0071806 | 5.25E-10          | protein transmembrane transport                                      |
| GO:0008233 | 5.79E-10          | peptidase activity                                                   |
| GO:0022884 | 8.40E-09          | macromolecule transmembrane transporter activity                     |
| GO:0009306 | 3.58E-08          | protein secretion                                                    |
| GO:0008061 | 4.22E-08          | chitin binding                                                       |
| GO:0015450 | 4.72E-08          | PP-bond-hydrolysis-driven protein transmembrane transporter activity |
| GO:0008320 | 9.99E-08          | protein transmembrane transporter activity                           |
| GO:0055085 | 1.74E-07          | transmembrane transport                                              |
| GO:0005215 | 2.18E-07          | transporter activity                                                 |
| GO:0060089 | 1.81E-06          | molecular transducer activity                                        |
| GO:0006022 | 1.02E-05          | aminoglycan metabolic process                                        |
| GO:0044699 | 2.40E-05          | single-organism process                                              |
| GO:0032940 | 3.01E-05          | secretion by cell                                                    |
| GO:0006040 | 8.76E-05          | amino sugar metabolic process                                        |
| GO:0008565 | 6.17E-04          | protein transporter activity                                         |
| GO:0005576 | 8.68E-04          | extracellular region                                                 |
| GO:0005575 | 1.83E-03          | cellular_component                                                   |
| GO:0046903 | 3.06E-03          | secretion                                                            |
| GO:0006605 | 5.04E-03          | protein targeting                                                    |
| GO:0044765 | 7.35E-03          | single-organism transport                                            |
| GO:0008150 | 7.35E-03          | biological_process                                                   |
| GO:0030246 | 7.35E-03          | carbohydrate binding                                                 |
| GO:1902578 | 8.10E-03          | single-organism localization                                         |
| GO:0048869 | 8.99E-03          | cellular developmental process                                       |
| GO:0051179 | 9.41E-03          | localization                                                         |

### Upregulated

| <b>ID</b>  | <b>p.adjusted</b> | <b>Biological function</b>                                |
|------------|-------------------|-----------------------------------------------------------|
| GO:0006457 | 7.3E-04           | protein folding                                           |
| GO:2000112 | 7.3E-04           | regulation of cellular macromolecule biosynthetic process |
| GO:0010556 | 7.3E-04           | regulation of macromolecule biosynthetic process          |
| GO:0005488 | 7.3E-04           | binding                                                   |
| GO:0032774 | 8.4E-04           | RNA biosynthetic process                                  |
| GO:0006351 | 1.1E-03           | transcription, DNA-templated                              |
| GO:0031326 | 1.4E-03           | regulation of cellular biosynthetic process               |
| GO:0043227 | 2.5E-03           | membrane-bounded organelle                                |
| GO:0043231 | 2.5E-03           | intracellular membrane-bounded organelle                  |
| GO:0031072 | 2.7E-03           | heat shock protein binding                                |
| GO:0046914 | 3.3E-03           | transition metal ion binding                              |
| GO:0010468 | 3.3E-03           | regulation of gene expression                             |
| GO:0044271 | 3.6E-03           | cellular nitrogen compound biosynthetic process           |
| GO:1901362 | 9.9E-03           | organic cyclic compound biosynthetic process              |
| GO:0005515 | 9.9E-03           | protein binding                                           |

|            |         |                                    |
|------------|---------|------------------------------------|
| GO:0018130 | 1.1E-02 | heterocycle biosynthetic process   |
| GO:0009889 | 1.5E-02 | regulation of biosynthetic process |
| GO:0051082 | 1.6E-02 | unfolded protein binding           |

#### D.24-D.starv

#### Downregulated

| ID         | p.adjusted | Biological function                                          |
|------------|------------|--------------------------------------------------------------|
| GO:0005856 | 1.89E-24   | cytoskeleton                                                 |
| GO:0006928 | 1.14E-22   | movement of cell or subcellular component                    |
| GO:0005875 | 6.93E-22   | microtubule associated complex                               |
| GO:0003774 | 4.90E-19   | motor activity                                               |
| GO:0007017 | 1.67E-17   | microtubule-based process                                    |
| GO:0044430 | 9.48E-14   | cytoskeletal part                                            |
| GO:0005509 | 1.40E-12   | calcium ion binding                                          |
| GO:0043234 | 3.51E-11   | protein complex                                              |
| GO:0030286 | 5.94E-09   | dynein complex                                               |
| GO:0044446 | 5.33E-08   | intracellular organelle part                                 |
| GO:0044422 | 1.20E-07   | organelle part                                               |
| GO:0072511 | 2.29E-06   | divalent inorganic cation transport                          |
| GO:0016817 | 4.29E-06   | hydrolase activity, acting on acid anhydrides                |
| GO:0048500 | 5.55E-06   | signal recognition particle                                  |
| GO:0072509 | 6.88E-06   | divalent inorganic cation transmembrane transporter activity |
| GO:0006614 | 2.72E-05   | SRP-dependent cotranslational protein targeting to membrane  |
| GO:0030001 | 4.06E-05   | metal ion transport                                          |
| GO:0070588 | 4.21E-05   | calcium ion transmembrane transport                          |
| GO:1901265 | 7.36E-05   | nucleoside phosphate binding                                 |
| GO:0045047 | 7.36E-05   | protein targeting to ER                                      |
| GO:0006418 | 7.36E-05   | tRNA aminoacylation for protein translation                  |
| GO:0012506 | 1.25E-04   | vesicle membrane                                             |
| GO:0016675 | 1.37E-04   | oxidoreductase activity, acting on a heme group of donors    |
| GO:0015002 | 1.37E-04   | heme-copper terminal oxidase activity                        |
| GO:0004129 | 1.37E-04   | cytochrome-c oxidase activity                                |
| GO:0004175 | 1.78E-04   | endopeptidase activity                                       |
| GO:0032502 | 1.99E-04   | developmental process                                        |
| GO:0009306 | 2.23E-04   | protein secretion                                            |
| GO:0070647 | 3.36E-04   | protein modification by small protein conjugation or removal |
| GO:0007018 | 5.24E-04   | microtubule-based movement                                   |
| GO:0008312 | 5.30E-04   | 7S RNA binding                                               |
| GO:0032501 | 5.67E-04   | multicellular organismal process                             |
| GO:0019205 | 6.12E-04   | nucleobase-containing compound kinase activity               |
| GO:0009073 | 7.33E-04   | aromatic amino acid family biosynthetic process              |
| GO:0046873 | 7.77E-04   | metal ion transmembrane transporter activity                 |
| GO:0031424 | 8.84E-04   | keratinization                                               |
| GO:0044767 | 9.42E-04   | single-organism developmental process                        |
| GO:0044763 | 1.03E-03   | single-organism cellular process                             |
| GO:0016192 | 1.15E-03   | vesicle-mediated transport                                   |
| GO:0005216 | 1.22E-03   | ion channel activity                                         |
| GO:0031988 | 1.22E-03   | membrane-bounded vesicle                                     |
| GO:0016023 | 1.22E-03   | cytoplasmic membrane-bounded vesicle                         |
| GO:0030855 | 1.33E-03   | epithelial cell differentiation                              |
| GO:0005488 | 1.43E-03   | binding                                                      |
| GO:0044707 | 2.27E-03   | single-multicellular organism process                        |
| GO:0006605 | 2.43E-03   | protein targeting                                            |
| GO:0019787 | 2.47E-03   | ubiquitin-like protein transferase activity                  |
| GO:0016874 | 2.47E-03   | ligase activity                                              |

|            |          |                                                                      |
|------------|----------|----------------------------------------------------------------------|
| GO:0005524 | 3.52E-03 | ATP binding                                                          |
| GO:0032559 | 3.52E-03 | adenyl ribonucleotide binding                                        |
| GO:0030554 | 3.52E-03 | adenyl nucleotide binding                                            |
| GO:0015085 | 3.73E-03 | calcium ion transmembrane transporter activity                       |
| GO:0090150 | 3.74E-03 | establishment of protein localization to membrane                    |
| GO:0070838 | 3.98E-03 | divalent metal ion transport                                         |
| GO:0072657 | 4.40E-03 | protein localization to membrane                                     |
| GO:0015450 | 5.48E-03 | PP-bond-hydrolysis-driven protein transmembrane transporter activity |
| GO:0006508 | 6.81E-03 | proteolysis                                                          |
| GO:0009190 | 7.05E-03 | cyclic nucleotide biosynthetic process                               |
| GO:0022857 | 7.51E-03 | transmembrane transporter activity                                   |
| GO:0016787 | 1.07E-02 | hydrolase activity                                                   |
| GO:0022884 | 1.09E-02 | macromolecule transmembrane transporter activity                     |
| GO:0031982 | 1.11E-02 | vesicle                                                              |
| GO:0071806 | 1.24E-02 | protein transmembrane transport                                      |
| GO:0072599 | 1.24E-02 | establishment of protein localization to endoplasmic reticulum       |
| GO:0019932 | 1.25E-02 | second-messenger-mediated signaling                                  |
| GO:0031410 | 1.25E-02 | cytoplasmic vesicle                                                  |
| GO:0004674 | 1.26E-02 | protein serine/threonine kinase activity                             |
| GO:0043228 | 1.44E-02 | non-membrane-bounded organelle                                       |
| GO:0044765 | 1.46E-02 | single-organism transport                                            |
| GO:0001882 | 1.53E-02 | nucleoside binding                                                   |
| GO:0030662 | 1.56E-02 | coated vesicle membrane                                              |
| GO:0044433 | 1.61E-02 | cytoplasmic vesicle part                                             |
| GO:0022803 | 1.61E-02 | passive transmembrane transporter activity                           |
| GO:0022838 | 1.61E-02 | substrate-specific channel activity                                  |
| GO:0008320 | 1.83E-02 | protein transmembrane transporter activity                           |
| GO:1902578 | 1.84E-02 | single-organism localization                                         |

## Upregulated

| <b>ID</b>  | <b>p.adjusted</b> | <b>Biological function</b>                    |
|------------|-------------------|-----------------------------------------------|
| GO:0006629 | 9.00E-06          | lipid metabolic process                       |
| GO:0052689 | 9.00E-06          | carboxylic ester hydrolase activity           |
| GO:0019866 | 1.07E-05          | organelle inner membrane                      |
| GO:0016298 | 1.16E-05          | lipase activity                               |
| GO:0044429 | 1.00E-04          | mitochondrial part                            |
| GO:0032993 | 1.00E-04          | protein-DNA complex                           |
| GO:0044815 | 1.41E-04          | DNA packaging complex                         |
| GO:1990104 | 1.41E-04          | DNA bending complex                           |
| GO:0005739 | 5.09E-04          | mitochondrion                                 |
| GO:0000785 | 1.02E-03          | chromatin                                     |
| GO:0016020 | 1.02E-03          | membrane                                      |
| GO:0031967 | 1.02E-03          | organelle envelope                            |
| GO:0030029 | 1.02E-03          | actin filament-based process                  |
| GO:0044710 | 1.09E-03          | single-organism metabolic process             |
| GO:0031975 | 1.19E-03          | envelope                                      |
| GO:0006508 | 2.18E-03          | proteolysis                                   |
| GO:0008654 | 2.44E-03          | phospholipid biosynthetic process             |
| GO:0006308 | 2.44E-03          | DNA catabolic process                         |
| GO:0008301 | 2.64E-03          | DNA binding, bending                          |
| GO:1901617 | 3.77E-03          | organic hydroxy compound biosynthetic process |
| GO:0008610 | 4.82E-03          | lipid biosynthetic process                    |
| GO:0006996 | 4.86E-03          | organelle organization                        |
| GO:0006644 | 5.71E-03          | phospholipid metabolic process                |
| GO:0006020 | 6.04E-03          | inositol metabolic process                    |

|            |          |                                                  |
|------------|----------|--------------------------------------------------|
| GO:0045454 | 6.32E-03 | cell redox homeostasis                           |
| GO:0034655 | 7.53E-03 | nucleobase-containing compound catabolic process |
| GO:0043687 | 7.53E-03 | post-translational protein modification          |
| GO:0031966 | 9.04E-03 | mitochondrial membrane                           |
| GO:0019439 | 9.51E-03 | aromatic compound catabolic process              |
| GO:0005694 | 9.57E-03 | chromosome                                       |
| GO:0008233 | 9.60E-03 | peptidase activity                               |
| GO:0044270 | 1.03E-02 | cellular nitrogen compound catabolic process     |
| GO:0018208 | 1.10E-02 | peptidyl-proline modification                    |
| GO:0046914 | 1.16E-02 | transition metal ion binding                     |
| GO:0030041 | 1.16E-02 | actin filament polymerization                    |
| GO:0006323 | 1.18E-02 | DNA packaging                                    |
| GO:0046700 | 1.20E-02 | heterocycle catabolic process                    |
| GO:0043227 | 1.26E-02 | membrane-bounded organelle                       |
| GO:0043231 | 1.33E-02 | intracellular membrane-bounded organelle         |
| GO:0044427 | 1.38E-02 | chromosomal part                                 |
| GO:0016491 | 1.57E-02 | oxidoreductase activity                          |
| GO:0019725 | 1.62E-02 | cellular homeostasis                             |
| GO:0090407 | 1.84E-02 | organophosphate biosynthetic process             |
| GO:1901361 | 1.84E-02 | organic cyclic compound catabolic process        |

#### B.24-D.24

#### Downregulated

| ID         | p.adjusted | Biological function                            |
|------------|------------|------------------------------------------------|
| GO:0016491 | 9.16E-34   | oxidoreductase activity                        |
| GO:0008301 | 6.37E-23   | DNA binding, bending                           |
| GO:0032993 | 2.97E-22   | protein-DNA complex                            |
| GO:0044710 | 2.97E-22   | single-organism metabolic process              |
| GO:0044815 | 7.07E-22   | DNA packaging complex                          |
| GO:1990104 | 7.07E-22   | DNA bending complex                            |
| GO:0048037 | 4.79E-21   | cofactor binding                               |
| GO:0006082 | 7.22E-21   | organic acid metabolic process                 |
| GO:0006323 | 1.32E-18   | DNA packaging                                  |
| GO:0031497 | 5.15E-17   | chromatin assembly                             |
| GO:0071824 | 6.80E-17   | protein-DNA complex subunit organization       |
| GO:0055114 | 8.97E-17   | oxidation-reduction process                    |
| GO:0034728 | 1.00E-16   | nucleosome organization                        |
| GO:0050660 | 6.91E-15   | flavin adenine dinucleotide binding            |
| GO:0006334 | 2.91E-13   | nucleosome assembly                            |
| GO:0065004 | 2.17E-12   | protein-DNA complex assembly                   |
| GO:0000786 | 2.49E-11   | nucleosome                                     |
| GO:0000785 | 8.27E-11   | chromatin                                      |
| GO:0006091 | 1.24E-10   | generation of precursor metabolites and energy |
| GO:0044424 | 1.62E-10   | intracellular part                             |
| GO:0044427 | 4.14E-10   | chromosomal part                               |
| GO:0008150 | 1.19E-08   | biological_process                             |
| GO:0005975 | 1.24E-08   | carbohydrate metabolic process                 |
| GO:0005694 | 4.89E-08   | chromosome                                     |
| GO:0003824 | 8.85E-08   | catalytic activity                             |
| GO:0006325 | 8.85E-08   | chromatin organization                         |
| GO:1901575 | 2.60E-07   | organic substance catabolic process            |
| GO:0008233 | 1.53E-06   | peptidase activity                             |
| GO:0006096 | 1.57E-06   | glycolytic process                             |
| GO:0042579 | 2.13E-06   | microbody                                      |
| GO:0009056 | 2.53E-06   | catabolic process                              |

|            |          |                                                                     |
|------------|----------|---------------------------------------------------------------------|
| GO:0043226 | 2.57E-06 | organelle                                                           |
| GO:1901564 | 3.86E-06 | organonitrogen compound metabolic process                           |
| GO:0071103 | 4.25E-06 | DNA conformation change                                             |
| GO:0032991 | 6.24E-06 | macromolecular complex                                              |
| GO:0006996 | 6.24E-06 | organelle organization                                              |
| GO:0044242 | 8.21E-06 | cellular lipid catabolic process                                    |
| GO:0006520 | 2.06E-05 | cellular amino acid metabolic process                               |
| GO:0044262 | 2.52E-05 | cellular carbohydrate metabolic process                             |
| GO:0019842 | 4.70E-05 | vitamin binding                                                     |
| GO:0022607 | 6.40E-05 | cellular component assembly                                         |
| GO:0016769 | 7.18E-05 | transferase activity, transferring nitrogenous groups               |
| GO:0045454 | 8.29E-05 | cell redox homeostasis                                              |
| GO:0006412 | 1.02E-04 | translation                                                         |
| GO:0009124 | 1.05E-04 | nucleoside monophosphate biosynthetic process                       |
| GO:0006470 | 1.09E-04 | protein dephosphorylation                                           |
| GO:0044422 | 1.09E-04 | organelle part                                                      |
| GO:0008519 | 1.61E-04 | ammonium transmembrane transporter activity                         |
| GO:0098661 | 1.96E-04 | inorganic anion transmembrane transport                             |
| GO:0030976 | 2.14E-04 | thiamine pyrophosphate binding                                      |
| GO:0098660 | 2.14E-04 | inorganic ion transmembrane transport                               |
| GO:0098662 | 2.14E-04 | inorganic cation transmembrane transport                            |
| GO:0016757 | 2.54E-04 | transferase activity, transferring glycosyl groups                  |
| GO:0000502 | 2.90E-04 | proteasome complex                                                  |
| GO:0009123 | 3.10E-04 | nucleoside monophosphate metabolic process                          |
| GO:0034440 | 3.10E-04 | lipid oxidation                                                     |
| GO:0015980 | 3.24E-04 | energy derivation by oxidation of organic compounds                 |
| GO:1901135 | 3.44E-04 | carbohydrate derivative metabolic process                           |
| GO:0015695 | 3.53E-04 | organic cation transport                                            |
| GO:0072488 | 3.80E-04 | ammonium transmembrane transport                                    |
| GO:0006818 | 4.28E-04 | hydrogen transport                                                  |
| GO:0019693 | 4.37E-04 | ribose phosphate metabolic process                                  |
| GO:0005839 | 4.37E-04 | proteasome core complex                                             |
| GO:0065003 | 4.37E-04 | macromolecular complex assembly                                     |
| GO:0071705 | 4.37E-04 | nitrogen compound transport                                         |
| GO:1901681 | 4.37E-04 | sulfur compound binding                                             |
| GO:0030332 | 4.41E-04 | cyclin binding                                                      |
| GO:0044085 | 4.75E-04 | cellular component biogenesis                                       |
| GO:0006508 | 5.05E-04 | proteolysis                                                         |
| GO:0005575 | 6.75E-04 | cellular_component                                                  |
| GO:0009055 | 7.38E-04 | electron carrier activity                                           |
| GO:0072522 | 7.83E-04 | purine-containing compound biosynthetic process                     |
| GO:0051726 | 8.48E-04 | regulation of cell cycle                                            |
| GO:0097472 | 1.05E-03 | cyclin-dependent protein kinase activity                            |
| GO:0071822 | 1.29E-03 | protein complex subunit organization                                |
| GO:0004693 | 1.55E-03 | cyclin-dependent protein serine/threonine kinase activity           |
| GO:0044712 | 1.55E-03 | single-organism catabolic process                                   |
| GO:0006812 | 1.65E-03 | cation transport                                                    |
| GO:0004298 | 1.66E-03 | threonine-type endopeptidase activity                               |
| GO:0015101 | 1.66E-03 | organic cation transmembrane transporter activity                   |
| GO:0065008 | 1.75E-03 | regulation of biological quality                                    |
| GO:0070003 | 1.75E-03 | threonine-type peptidase activity                                   |
| GO:0005506 | 1.93E-03 | iron ion binding                                                    |
| GO:1901137 | 1.93E-03 | carbohydrate derivative biosynthetic process                        |
| GO:0008509 | 2.05E-03 | anion transmembrane transporter activity                            |
| GO:0044255 | 2.35E-03 | cellular lipid metabolic process                                    |
| GO:0016538 | 2.37E-03 | cyclin-dependent protein serine/threonine kinase regulator activity |

|            |          |                                                                  |
|------------|----------|------------------------------------------------------------------|
| GO:1902600 | 2.37E-03 | hydrogen ion transmembrane transport                             |
| GO:0043227 | 3.07E-03 | membrane-bounded organelle                                       |
| GO:0016311 | 3.09E-03 | dephosphorylation                                                |
| GO:0004674 | 3.35E-03 | protein serine/threonine kinase activity                         |
| GO:0043231 | 3.45E-03 | intracellular membrane-bounded organelle                         |
| GO:0046912 | 3.76E-03 | transferase activity, transferring acyl groups                   |
| GO:0098656 | 3.80E-03 | anion transmembrane transport                                    |
| GO:0006631 | 4.09E-03 | fatty acid metabolic process                                     |
| GO:0009163 | 4.83E-03 | nucleoside biosynthetic process                                  |
| GO:0006414 | 5.36E-03 | translational elongation                                         |
| GO:0015696 | 5.48E-03 | ammonium transport                                               |
| GO:0030163 | 6.05E-03 | protein catabolic process                                        |
| GO:0043413 | 6.69E-03 | macromolecule glycosylation                                      |
| GO:0019395 | 6.77E-03 | fatty acid oxidation                                             |
| GO:0051287 | 7.53E-03 | NAD binding                                                      |
| GO:0006730 | 8.63E-03 | one-carbon metabolic process                                     |
| GO:0030337 | 9.30E-03 | DNA polymerase processivity factor activity                      |
| GO:0003677 | 1.06E-02 | DNA binding                                                      |
| GO:0051540 | 1.12E-02 | metal cluster binding                                            |
| GO:0046034 | 1.12E-02 | ATP metabolic process                                            |
| GO:0072329 | 1.15E-02 | monocarboxylic acid catabolic process                            |
| GO:0006629 | 1.16E-02 | lipid metabolic process                                          |
| GO:0098589 | 1.17E-02 | membrane region                                                  |
| GO:0016042 | 1.22E-02 | lipid catabolic process                                          |
| GO:0009142 | 1.36E-02 | nucleoside triphosphate biosynthetic process                     |
| GO:0016884 | 1.44E-02 | carbon-nitrogen ligase activity, with glutamine as amido-N-donor |
| GO:0006486 | 1.44E-02 | protein glycosylation                                            |
| GO:0003735 | 1.44E-02 | structural constituent of ribosome                               |
| GO:0006164 | 1.46E-02 | purine nucleotide biosynthetic process                           |
| GO:0006119 | 1.46E-02 | oxidative phosphorylation                                        |
| GO:0098655 | 1.47E-02 | cation transmembrane transport                                   |
| GO:0008237 | 1.61E-02 | metallopeptidase activity                                        |
| GO:0005789 | 1.63E-02 | endoplasmic reticulum membrane                                   |
| GO:0006754 | 1.67E-02 | ATP biosynthetic process                                         |
| GO:0030170 | 1.67E-02 | pyridoxal phosphate binding                                      |
| GO:0005623 | 1.67E-02 | cell                                                             |
| GO:0044464 | 1.67E-02 | cell part                                                        |
| GO:0032787 | 1.69E-02 | monocarboxylic acid metabolic process                            |
| GO:0042175 | 1.70E-02 | nuclear outer membrane-endoplasmic reticulum membrane network    |
| GO:0009141 | 1.73E-02 | nucleoside triphosphate metabolic process                        |
| GO:0042625 | 1.77E-02 | ATPase activity, coupled to transmembrane movement of ions       |
| GO:0072521 | 1.83E-02 | purine-containing compound metabolic process                     |
| GO:0009062 | 1.91E-02 | fatty acid catabolic process                                     |
| GO:0016758 | 1.91E-02 | transferase activity, transferring hexosyl groups                |

#### Upregulated

| <b>ID</b>  | <b>p.adjusted</b> | <b>Biological function</b>                         |
|------------|-------------------|----------------------------------------------------|
| GO:0051082 | 1.5E-04           | unfolded protein binding                           |
| GO:0006457 | 1.2E-02           | protein folding                                    |
| GO:0043168 | 2.6E-02           | anion binding                                      |
| GO:0003674 | 2.6E-02           | molecular_function                                 |
| GO:0005853 | 2.6E-02           | eukaryotic translation elongation factor 1 complex |
| GO:0005488 | 3.9E-02           | binding                                            |
| GO:0048870 | 5.8E-02           | cell motility                                      |
| GO:0006468 | 5.8E-02           | protein phosphorylation                            |

|            |         |                                                                 |
|------------|---------|-----------------------------------------------------------------|
| GO:0051674 | 7.2E-02 | localization of cell                                            |
| GO:0005952 | 7.2E-02 | cAMP-dependent protein kinase complex                           |
| GO:0016772 | 7.2E-02 | transferase activity, transferring phosphorus-containing groups |
| GO:0006793 | 7.2E-02 | phosphorus metabolic process                                    |
| GO:0006418 | 7.2E-02 | tRNA aminoacylation for protein translation                     |
| GO:0005984 | 7.2E-02 | disaccharide metabolic process                                  |
| GO:0072509 | 7.2E-02 | divalent inorganic cation transmembrane transporter activity    |
| GO:0018193 | 7.3E-02 | peptidyl-amino acid modification                                |
| GO:0008135 | 7.9E-02 | translation factor activity, nucleic acid binding               |
| GO:0016272 | 7.9E-02 | prefoldin complex                                               |
| GO:0097367 | 9.4E-02 | carbohydrate derivative binding                                 |
| GO:0016051 | 1.2E-01 | carbohydrate biosynthetic process                               |
| GO:0044267 | 1.5E-01 | cellular protein metabolic process                              |
| GO:0005388 | 1.6E-01 | calcium-transporting ATPase activity                            |
| GO:0009288 | 1.6E-01 | bacterial-type flagellum                                        |
| GO:1901363 | 1.6E-01 | heterocyclic compound binding                                   |
| GO:0097159 | 1.6E-01 | organic cyclic compound binding                                 |
| GO:0036094 | 1.6E-01 | small molecule binding                                          |
| GO:0003746 | 1.6E-01 | translation elongation factor activity                          |
| GO:0046434 | 1.6E-01 | organophosphate catabolic process                               |
| GO:0040011 | 1.7E-01 | locomotion                                                      |
| GO:0009311 | 1.7E-01 | oligosaccharide metabolic process                               |
| GO:0032312 | 1.9E-01 | regulation of ARF GTPase activity                               |
| GO:0072511 | 1.9E-01 | divalent inorganic cation transport                             |

#### B.6-B.24

##### Downregulated

| ID         | p.adjusted | Biological function                                         |
|------------|------------|-------------------------------------------------------------|
| GO:0006259 | 5.9E-16    | DNA metabolic process                                       |
| GO:0006260 | 1.9E-14    | DNA replication                                             |
| GO:0071897 | 2.0E-14    | DNA biosynthetic process                                    |
| GO:0006725 | 6.4E-14    | cellular aromatic compound metabolic process                |
| GO:0034641 | 4.3E-13    | cellular nitrogen compound metabolic process                |
| GO:0046483 | 8.0E-13    | heterocycle metabolic process                               |
| GO:0090304 | 2.3E-12    | nucleic acid metabolic process                              |
| GO:1901360 | 8.4E-12    | organic cyclic compound metabolic process                   |
| GO:0006139 | 1.4E-10    | nucleobase-containing compound metabolic process            |
| GO:0043231 | 1.1E-07    | intracellular membrane-bounded organelle                    |
| GO:0016887 | 1.8E-07    | ATPase activity                                             |
| GO:0043227 | 1.9E-07    | membrane-bounded organelle                                  |
| GO:0006807 | 3.5E-07    | nitrogen compound metabolic process                         |
| GO:0018130 | 6.2E-07    | heterocycle biosynthetic process                            |
| GO:1901362 | 7.3E-07    | organic cyclic compound biosynthetic process                |
| GO:0019438 | 1.1E-06    | aromatic compound biosynthetic process                      |
| GO:0044271 | 3.6E-06    | cellular nitrogen compound biosynthetic process             |
| GO:0010468 | 7.8E-06    | regulation of gene expression                               |
| GO:0006270 | 2.3E-05    | DNA replication initiation                                  |
| GO:0008150 | 2.4E-05    | biological_process                                          |
| GO:0016782 | 6.3E-05    | transferase activity, transferring sulfur-containing groups |
| GO:1901363 | 2.3E-04    | heterocyclic compound binding                               |
| GO:0097159 | 2.3E-04    | organic cyclic compound binding                             |
| GO:0003824 | 5.4E-04    | catalytic activity                                          |
| GO:0016020 | 7.3E-04    | membrane                                                    |
| GO:0016779 | 8.5E-04    | nucleotidyltransferase activity                             |
| GO:0034645 | 1.2E-03    | cellular macromolecule biosynthetic process                 |

|            |         |                                                    |
|------------|---------|----------------------------------------------------|
| GO:0005971 | 1.3E-03 | ribonucleoside-diphosphate reductase complex       |
| GO:0005694 | 2.3E-03 | chromosome                                         |
| GO:0043168 | 2.3E-03 | anion binding                                      |
| GO:0006457 | 2.6E-03 | protein folding                                    |
| GO:0046983 | 4.1E-03 | protein dimerization activity                      |
| GO:0009059 | 4.5E-03 | macromolecule biosynthetic process                 |
| GO:0016070 | 4.8E-03 | RNA metabolic process                              |
| GO:0018106 | 5.2E-03 | peptidyl-histidine phosphorylation                 |
| GO:0004673 | 5.2E-03 | protein histidine kinase activity                  |
| GO:0044249 | 5.7E-03 | cellular biosynthetic process                      |
| GO:0016757 | 6.1E-03 | transferase activity, transferring glycosyl groups |
| GO:0016817 | 6.3E-03 | hydrolase activity, acting on acid anhydrides      |
| GO:0048037 | 6.6E-03 | cofactor binding                                   |
| GO:0005215 | 6.6E-03 | transporter activity                               |
| GO:0044710 | 6.6E-03 | single-organism metabolic process                  |
| GO:0008094 | 7.1E-03 | DNA-dependent ATPase activity                      |
| GO:0016787 | 1.5E-02 | hydrolase activity                                 |
| GO:0018202 | 1.9E-02 | peptidyl-histidine modification                    |

### Upregulated

| ID         | p.adjusted | Biological function                                                  |
|------------|------------|----------------------------------------------------------------------|
| GO:0005840 | 6.0E-19    | ribosome                                                             |
| GO:0030529 | 7.1E-15    | ribonucleoprotein complex                                            |
| GO:0006414 | 1.1E-13    | translational elongation                                             |
| GO:0005737 | 1.3E-11    | cytoplasm                                                            |
| GO:0022884 | 2.6E-10    | macromolecule transmembrane transporter activity                     |
| GO:0005198 | 6.9E-10    | structural molecule activity                                         |
| GO:0006412 | 2.2E-09    | translation                                                          |
| GO:0044444 | 2.9E-09    | cytoplasmic part                                                     |
| GO:0071806 | 4.9E-08    | protein transmembrane transport                                      |
| GO:0008233 | 4.9E-08    | peptidase activity                                                   |
| GO:0019538 | 9.8E-08    | protein metabolic process                                            |
| GO:0008320 | 1.2E-07    | protein transmembrane transporter activity                           |
| GO:0015450 | 1.6E-07    | PP-bond-hydrolysis-driven protein transmembrane transporter activity |
| GO:0043228 | 4.1E-06    | non-membrane-bounded organelle                                       |
| GO:0043232 | 9.3E-06    | intracellular non-membrane-bounded organelle                         |
| GO:0009306 | 2.3E-04    | protein secretion                                                    |
| GO:0045454 | 2.3E-04    | cell redox homeostasis                                               |
| GO:0003735 | 2.3E-04    | structural constituent of ribosome                                   |
| GO:0019725 | 3.9E-03    | cellular homeostasis                                                 |
| GO:0008565 | 6.4E-03    | protein transporter activity                                         |
| GO:0046700 | 1.5E-02    | heterocycle catabolic process                                        |
| GO:0044106 | 1.5E-02    | cellular amine metabolic process                                     |
| GO:0004674 | 1.7E-02    | protein serine/threonine kinase activity                             |
| GO:0051082 | 1.7E-02    | unfolded protein binding                                             |
| GO:0018212 | 1.7E-02    | peptidyl-tyrosine modification                                       |
| GO:1901361 | 1.7E-02    | organic cyclic compound catabolic process                            |

### A.31-B.6

#### Downregulated

| ID         | p.adjusted | Biological function       |
|------------|------------|---------------------------|
| GO:0006414 | 2.2E-16    | translational elongation  |
| GO:0006412 | 1.7E-10    | translation               |
| GO:0005737 | 3.8E-10    | cytoplasm                 |
| GO:0030529 | 7.3E-10    | ribonucleoprotein complex |



|            |         |                                                                      |
|------------|---------|----------------------------------------------------------------------|
| GO:0044444 | 7.4E-10 | cytoplasmic part                                                     |
| GO:0005840 | 1.2E-09 | ribosome                                                             |
| GO:0005198 | 1.5E-09 | structural molecule activity                                         |
| GO:0043228 | 1.7E-07 | non-membrane-bounded organelle                                       |
| GO:0008233 | 1.8E-07 | peptidase activity                                                   |
| GO:0043232 | 2.8E-07 | intracellular non-membrane-bounded organelle                         |
| GO:0022884 | 7.8E-07 | macromolecule transmembrane transporter activity                     |
| GO:0071806 | 3.2E-05 | protein transmembrane transport                                      |
| GO:0015450 | 5.0E-05 | PP-bond-hydrolysis-driven protein transmembrane transporter activity |
| GO:0008320 | 1.5E-04 | protein transmembrane transporter activity                           |
| GO:0019205 | 4.0E-04 | nucleobase-containing compound kinase activity                       |
| GO:0009309 | 4.0E-04 | amine biosynthetic process                                           |
| GO:0046939 | 5.2E-04 | nucleotide phosphorylation                                           |
| GO:0044281 | 5.2E-04 | small molecule metabolic process                                     |
| GO:0044106 | 1.3E-03 | cellular amine metabolic process                                     |
| GO:0009306 | 1.3E-03 | protein secretion                                                    |
| GO:0043492 | 2.9E-03 | ATPase activity, coupled to movement of substances                   |
| GO:0051082 | 5.9E-03 | unfolded protein binding                                             |
| GO:0016776 | 7.4E-03 | phosphotransferase activity, phosphate group as acceptor             |
| GO:0004674 | 7.6E-03 | protein serine/threonine kinase activity                             |
| GO:0016301 | 1.2E-02 | kinase activity                                                      |
| GO:0046906 | 1.3E-02 | tetrapyrrole binding                                                 |
| GO:0019899 | 1.4E-02 | enzyme binding                                                       |
| GO:0004690 | 1.6E-02 | cyclic nucleotide-dependent protein kinase activity                  |
| GO:0072527 | 1.6E-02 | pyrimidine-containing compound metabolic process                     |
| GO:0008565 | 1.6E-02 | protein transporter activity                                         |
| GO:0055086 | 1.6E-02 | nucleobase-containing small molecule metabolic process               |
| GO:0072528 | 1.9E-02 | pyrimidine-containing compound biosynthetic process                  |
| GO:0032991 | 1.9E-02 | macromolecular complex                                               |

### Upregulated

| <b>ID</b>  | <b>p.adjusted</b> | <b>Biological function</b>                       |
|------------|-------------------|--------------------------------------------------|
| GO:0006260 | 1.09E-13          | DNA replication                                  |
| GO:0071897 | 1.09E-13          | DNA biosynthetic process                         |
| GO:0006259 | 1.31E-11          | DNA metabolic process                            |
| GO:0090304 | 3.58E-11          | nucleic acid metabolic process                   |
| GO:0006725 | 1.25E-10          | cellular aromatic compound metabolic process     |
| GO:1901360 | 2.08E-09          | organic cyclic compound metabolic process        |
| GO:0016817 | 2.38E-09          | hydrolase activity, acting on acid anhydrides    |
| GO:0034641 | 3.08E-08          | cellular nitrogen compound metabolic process     |
| GO:0046483 | 4.90E-08          | heterocycle metabolic process                    |
| GO:0016491 | 1.11E-07          | oxidoreductase activity                          |
| GO:0043231 | 1.29E-06          | intracellular membrane-bounded organelle         |
| GO:0043227 | 1.56E-06          | membrane-bounded organelle                       |
| GO:0006139 | 1.56E-06          | nucleobase-containing compound metabolic process |
| GO:0008150 | 2.17E-06          | biological_process                               |
| GO:0048037 | 5.50E-06          | cofactor binding                                 |
| GO:0016779 | 6.78E-06          | nucleotidyltransferase activity                  |
| GO:0043168 | 2.07E-05          | anion binding                                    |
| GO:0016787 | 2.08E-05          | hydrolase activity                               |
| GO:0016054 | 2.13E-05          | organic acid catabolic process                   |
| GO:0044282 | 2.42E-05          | small molecule catabolic process                 |
| GO:0006082 | 3.29E-05          | organic acid metabolic process                   |
| GO:0006629 | 4.39E-05          | lipid metabolic process                          |
| GO:0015299 | 4.63E-05          | solute:proton antiporter activity                |
| GO:0006807 | 5.71E-05          | nitrogen compound metabolic process              |

|            |          |                                                              |
|------------|----------|--------------------------------------------------------------|
| GO:0050660 | 1.86E-04 | flavin adenine dinucleotide binding                          |
| GO:0055114 | 1.91E-04 | oxidation-reduction process                                  |
| GO:0016887 | 2.13E-04 | ATPase activity                                              |
| GO:0043413 | 2.69E-04 | macromolecule glycosylation                                  |
| GO:0006520 | 2.69E-04 | cellular amino acid metabolic process                        |
| GO:0046395 | 3.00E-04 | carboxylic acid catabolic process                            |
| GO:0044710 | 3.00E-04 | single-organism metabolic process                            |
| GO:0003676 | 3.28E-04 | nucleic acid binding                                         |
| GO:0042579 | 3.31E-04 | microbody                                                    |
| GO:0016769 | 3.31E-04 | transferase activity, transferring nitrogenous groups        |
| GO:0034440 | 4.25E-04 | lipid oxidation                                              |
| GO:0016042 | 4.79E-04 | lipid catabolic process                                      |
| GO:0044242 | 5.50E-04 | cellular lipid catabolic process                             |
| GO:0009059 | 6.04E-04 | macromolecule biosynthetic process                           |
| GO:0034645 | 7.19E-04 | cellular macromolecule biosynthetic process                  |
| GO:0022613 | 7.65E-04 | ribonucleoprotein complex biogenesis                         |
| GO:0016070 | 8.56E-04 | RNA metabolic process                                        |
| GO:0044255 | 9.29E-04 | cellular lipid metabolic process                             |
| GO:0004386 | 1.03E-03 | helicase activity                                            |
| GO:0046834 | 1.69E-03 | lipid phosphorylation                                        |
| GO:0009100 | 1.84E-03 | glycoprotein metabolic process                               |
| GO:0006486 | 2.36E-03 | protein glycosylation                                        |
| GO:0005575 | 2.86E-03 | cellular_component                                           |
| GO:0003824 | 3.06E-03 | catalytic activity                                           |
| GO:0019395 | 3.51E-03 | fatty acid oxidation                                         |
| GO:0072329 | 3.85E-03 | monocarboxylic acid catabolic process                        |
| GO:0030684 | 3.98E-03 | preribosome                                                  |
| GO:0016627 | 4.20E-03 | oxidoreductase activity, acting on the CH-CH group of donors |
| GO:0022804 | 4.54E-03 | active transmembrane transporter activity                    |
| GO:0015298 | 4.55E-03 | solute:cation antiporter activity                            |
| GO:0008237 | 4.85E-03 | metallopeptidase activity                                    |
| GO:0008289 | 4.85E-03 | lipid binding                                                |
| GO:0030170 | 4.85E-03 | pyridoxal phosphate binding                                  |
| GO:0016757 | 4.85E-03 | transferase activity, transferring glycosyl groups           |
| GO:0006270 | 5.03E-03 | DNA replication initiation                                   |
| GO:0015662 | 5.20E-03 | ATPase activity, coupled to transmembrane movement of ions   |
| GO:0051056 | 6.57E-03 | regulation of small GTPase mediated signal transduction      |
| GO:0044249 | 6.98E-03 | cellular biosynthetic process                                |
| GO:1901363 | 7.65E-03 | heterocyclic compound binding                                |
| GO:0097159 | 7.65E-03 | organic cyclic compound binding                              |
| GO:0006644 | 7.72E-03 | phospholipid metabolic process                               |
| GO:0009101 | 7.95E-03 | glycoprotein biosynthetic process                            |
| GO:0009062 | 8.17E-03 | fatty acid catabolic process                                 |
| GO:0005215 | 8.21E-03 | transporter activity                                         |
| GO:0016741 | 8.78E-03 | transferase activity, transferring one-carbon groups         |
| GO:1902531 | 8.78E-03 | regulation of intracellular signal transduction              |
| GO:0005730 | 8.86E-03 | nucleolus                                                    |
| GO:0009966 | 9.14E-03 | regulation of signal transduction                            |
| GO:0005543 | 9.60E-03 | phospholipid binding                                         |

#### A.31-H.14

#### Downregulated

| ID         | p.adjusted | Biological function                              |
|------------|------------|--------------------------------------------------|
| GO:0022884 | 1.3E-08    | macromolecule transmembrane transporter activity |
| GO:0071806 | 2.3E-08    | protein transmembrane transport                  |

|            |         |                                                                      |
|------------|---------|----------------------------------------------------------------------|
| GO:0015450 | 4.8E-07 | PP-bond-hydrolysis-driven protein transmembrane transporter activity |
| GO:0016020 | 1.6E-05 | membrane                                                             |
| GO:0009306 | 2.9E-05 | protein secretion                                                    |
| GO:0008565 | 2.9E-05 | protein transporter activity                                         |
| GO:0008320 | 2.9E-05 | protein transmembrane transporter activity                           |
| GO:0008233 | 5.0E-03 | peptidase activity                                                   |
| GO:0032940 | 1.4E-02 | secretion by cell                                                    |
| GO:0070001 | 1.4E-02 | aspartic-type peptidase activity                                     |
| GO:0022804 | 1.8E-02 | active transmembrane transporter activity                            |

### Upregulated

| <b>ID</b>  | <b>p.adjusted</b> | <b>Biological function</b>                            |
|------------|-------------------|-------------------------------------------------------|
| GO:0006508 | 1.8E-04           | proteolysis                                           |
| GO:0003824 | 1.8E-04           | catalytic activity                                    |
| GO:0016491 | 7.1E-04           | oxidoreductase activity                               |
| GO:0071897 | 1.4E-03           | DNA biosynthetic process                              |
| GO:0006260 | 1.5E-03           | DNA replication                                       |
| GO:0043227 | 3.3E-03           | membrane-bounded organelle                            |
| GO:0043231 | 3.3E-03           | intracellular membrane-bounded organelle              |
| GO:0048037 | 3.5E-03           | cofactor binding                                      |
| GO:0006082 | 6.5E-03           | organic acid metabolic process                        |
| GO:0044710 | 1.1E-02           | single-organism metabolic process                     |
| GO:0016769 | 1.1E-02           | transferase activity, transferring nitrogenous groups |
| GO:1901575 | 1.4E-02           | organic substance catabolic process                   |
| GO:0030170 | 1.4E-02           | pyridoxal phosphate binding                           |
| GO:0008150 | 1.4E-02           | biological_process                                    |
| GO:0016817 | 1.4E-02           | hydrolase activity, acting on acid anhydrides         |
| GO:0044699 | 1.5E-02           | single-organism process                               |
| GO:0005975 | 1.5E-02           | carbohydrate metabolic process                        |
| GO:0006259 | 1.5E-02           | DNA metabolic process                                 |
| GO:0055114 | 1.8E-02           | oxidation-reduction process                           |
